# Supplementary material
Source: PubMed Central journal article supplement (PMC3810081)
Supplement: ASN.2013010019_ASN2013010019SupplementaryData.pdf [file ASN.2013010019_ASN2013010019SupplementaryData.pdf]

**SUPPLEMENTARY TABLE 1. Correlations Among Log-transformed Urinary Biomarkers, not indexed to urinary creatinine\***

|                                           | $\alpha$ 1-microglobulin | $\beta$ 2-microglobulin | Calbindin | Clusterin | CTGF | Cys-C | GST- $\alpha$ | Kim-1 | NGAL | OPN    | TFF-3 | THP  | TIMP-1 | VEGF |
|-------------------------------------------|--------------------------|-------------------------|-----------|-----------|------|-------|---------------|-------|------|--------|-------|------|--------|------|
| <b><math>\alpha</math>1-microglobulin</b> | 1.00                     | 0.68                    | 0.65      | 0.53      | 0.39 | 0.68  | 0.38          | 0.56  | 0.36 | 0.26   | 0.40  | 0.53 | 0.42   | 0.64 |
| <b><math>\beta</math>2-microglobulin</b>  | -                        | 1.00                    | 0.68      | 0.73      | 0.38 | 0.81  | 0.34          | 0.53  | 0.44 | 0.05** | 0.27  | 0.49 | 0.46   | 0.60 |
| <b>Calbindin</b>                          | -                        | -                       | 1.00      | 0.66      | 0.46 | 0.75  | 0.36          | 0.67  | 0.36 | 0.37   | 0.25  | 0.65 | 0.41   | 0.75 |
| <b>Clusterin</b>                          | -                        | -                       | -         | 1.00      | 0.53 | 0.75  | 0.45          | 0.56  | 0.39 | 0.02*  | 0.10  | 0.52 | 0.37   | 0.58 |
| <b>CTGF</b>                               | -                        | -                       | -         | -         | 1.00 | 0.44  | 0.57          | 0.47  | 0.18 | 0.29   | 0.20  | 0.33 | 0.32   | 0.45 |
| <b>Cystatin-C</b>                         | -                        | -                       | -         | -         | -    | 1.00  | 0.40          | 0.59  | 0.35 | 0.26   | 0.24  | 0.54 | 0.45   | 0.65 |
| <b>GST-<math>\alpha</math></b>            | -                        | -                       | -         | -         | -    | -     | 1.00          | 0.39  | 0.15 | 0.19   | 0.13  | 0.27 | 0.26   | 0.36 |
| <b>Kim-1</b>                              | -                        | -                       | -         | -         | -    | -     | -             | 1.00  | 0.38 | 0.37   | 0.28  | 0.66 | 0.41   | 0.75 |
| <b>NGAL</b>                               | -                        | -                       | -         | -         | -    | -     | -             | -     | 1.00 | -0.11  | 0.11  | 0.42 | 0.34   | 0.38 |
| <b>Osteopontin</b>                        | -                        | -                       | -         | -         | -    | -     | -             | -     | -    | 1.00   | 0.43  | 0.26 | 0.17   | 0.37 |
| <b>Trefoil Factor-3</b>                   | -                        | -                       | -         | -         | -    | -     | -             | -     | -    | -      | 1.00  | 0.19 | 0.21   | 0.30 |
| <b>Tamm-Horsfall Protein</b>              | -                        | -                       | -         | -         | -    | -     | -             | -     | -    | -      | -     | 1.00 | 0.33   | 0.70 |
| <b>TIMP-1</b>                             | -                        | -                       | -         | -         | -    | -     | -             | -     | -    | -      | -     | -    | 1.00   | 0.53 |
| <b>VEGF</b>                               | -                        | -                       | -         | -         | -    | -     | -             | -     | -    | -      | -     | -    | -      | 1.00 |

\*All p-values<0.001 with the exception of OPN and  $\beta$ 2-microglobulin (p=0.009), between OPN and Clusterin (p=0.20)

Values are multivariable-adjusted Pearson correlation coefficients.

Abbreviations: CTGF Connective Tissue Growth Factor; Cys-C, Cystatin-C; GST- $\alpha$ , Glutathione S-transferase alpha; Kim-1, Kidney injury molecule 1; NGAL, Neutrophil gelatinase-associated lipocalin; OPN, Osteopontin; TFF-3, Trefoil Factor-3; THP, Tamm Horsfall Protein; TIMP-1, Tissue inhibitor of matrix metalloproteinase-1; VEGF, Vascular endothelial growth factor.

**Supplementary table 2.** Multivariable-adjusted linear regression of log-transformed urinary biomarker levels, indexed to urinary creatinine, and continuous rapid decline in eGFR.

|                              | <b>Incident CKD</b>  |                |
|------------------------------|----------------------|----------------|
| <b>N cases/total n</b>       | <b>288 / 2141</b>    |                |
| <b>Biomarker</b>             | <b>OR [95% C.I.]</b> | <b>P-value</b> |
| <b>α1-microglobulin</b>      | 1.09 [0.94, 1.26]    | 0.3            |
| <b>β2-microglobulin</b>      | 0.99 [0.85, 1.16]    | 0.9            |
| <b>Calbindin</b>             | 1.01 [0.87, 1.18]    | 0.9            |
| <b>Clusterin</b>             | 1.00 [0.86, 1.17]    | 1.0            |
| <b>CTGF</b>                  | 0.99 [0.85, 1.16]    | 0.9            |
| <b>Cystatin-C</b>            | 0.98 [0.84, 1.14]    | 0.8            |
| <b>GST-α</b>                 | 1.05 [0.90, 1.23]    | 0.5            |
| <b>Kim-1</b>                 | 1.09 [0.94, 1.27]    | 0.3            |
| <b>NGAL</b>                  | 1.01 [0.87, 1.18]    | 0.9            |
| <b>Osteopontin</b>           | 0.95 [0.82, 1.10]    | 0.5            |
| <b>Trefoil Factor-3</b>      | 1.06 [0.91, 1.24]    | 0.4            |
| <b>Tamm-Horsfall Protein</b> | 1.05 [0.91, 1.21]    | 0.5            |
| <b>TIMP-1</b>                | 0.96 [0.82, 1.12]    | 0.6            |
| <b>VEGF</b>                  | 0.99 [0.86, 1.15]    | 0.9            |

Risks presented per 1-SD increment in the natural logarithm of the biomarker.

Rapid decline in estimated glomerular filtration rate was defined as a loss of >3ml/min/1.73m<sup>2</sup>/year. Analysis adjusted for age, sex, baseline glomerular filtration rate, hypertension, diabetes and dipstick proteinuria.
